# Supplementary material
Source: HighWire-hosted journal article supplement (https://bmjopen.bmj.com/content/12/9/e063821)
Supplement: inline-supplementary-material-1 [file inline-supplementary-material-1.pdf]

# ICU Nurses Knowledge, Belief and Practices Survey

## Scale for Subsyndromal Delirium

To help readers to understand this study, we have translated the questionnaire into English.

| Items                                                                                                           | Score         |          |          |       |            |
|-----------------------------------------------------------------------------------------------------------------|---------------|----------|----------|-------|------------|
|                                                                                                                 | Very disagree | Disagree | Not Sure | Agree | Very Agree |
| 1. Do you know the difference between Subsyndromal Delirium (SSD) and delirium?                                 | 1             | 2        | 3        | 4     | 5          |
| 2. Do you know the scoring criteria for SSD?                                                                    | 1             | 2        | 3        | 4     | 5          |
| 3. Do you know that SSD is a clinical symptom, not a disease?                                                   | 1             | 2        | 3        | 4     | 5          |
| 4. Do you know of any clear definition and diagnostic criteria for SSD?                                         | 1             | 2        | 3        | 4     | 5          |
| 5. Do you know the specific clinical manifestations of SSD?                                                     | 1             | 2        | 3        | 4     | 5          |
| 6. Do you know the incidence of SSD in ICU patients?                                                            | 1             | 2        | 3        | 4     | 5          |
| 7. Do you know what are the high risks for SSD?                                                                 | 1             | 2        | 3        | 4     | 5          |
| 8. Do you think the actual occurrence of SSD in ICU is higher than the definite diagnosis in clinical practice? | 1             | 2        | 3        | 4     | 5          |
| 9. Do you know the major risk factors for SSD?                                                                  | 1             | 2        | 3        | 4     | 5          |
| 10. Do you know the consequences of SSD?                                                                        | 1             | 2        | 3        | 4     | 5          |
| 11. Do you know what assessment tools can diagnose SSD?                                                         | 1             | 2        | 3        | 4     | 5          |

|                                                                                                  |                      |                 |                 |              |                   |
|--------------------------------------------------------------------------------------------------|----------------------|-----------------|-----------------|--------------|-------------------|
| 12. Do you know what are the main nursing measures to prevent SSD?                               | 1                    | 2               | 3               | 4            | 5                 |
| 13. Do you know that SSD exists and is often hidden in delirium-negative patients?               | 1                    | 2               | 3               | 4            | 5                 |
| 14. Do you know that non-pharmacological is the preferred intervention for the treatment of SSD? | 1                    | 2               | 3               | 4            | 5                 |
| 15. Do you know how to conduct health education for patients with SSD and their families?        | 1                    | 2               | 3               | 4            | 5                 |
| <b>Attitudes</b>                                                                                 | <b>Very disagree</b> | <b>Disagree</b> | <b>Not Sure</b> | <b>Agree</b> | <b>Very Agree</b> |
| 16. Do you think it is necessary for ICU nurses to know about SSD in their clinical work?        | 1                    | 2               | 3               | 4            | 5                 |
| 17. Do you think it is necessary for ICU nurses to be able to assess and diagnose SSD?           | 1                    | 2               | 3               | 4            | 5                 |
| 18. Do you think your knowledge of SSD meets clinical needs?                                     | 1                    | 2               | 3               | 4            | 5                 |
| 19. Do you think it is necessary to routinely use assessment tools to assess SSD?                | 1                    | 2               | 3               | 4            | 5                 |
| 20. Do you think SSD is widely recognised and effectively treated by medical professionals?      | 1                    | 2               | 3               | 4            | 5                 |
| 21. Do you think it is necessary for ICU staff to make bedside rounds and discuss SSD together?  | 1                    | 2               | 3               | 4            | 5                 |
| 22. I would like to receive training in SSD.                                                     | 1                    | 2               | 3               | 4            | 5                 |
| <b>Practices</b>                                                                                 | <b>Very disagree</b> | <b>Disagree</b> | <b>Not Sure</b> | <b>Agree</b> | <b>Very Agree</b> |
| 23. I can timeously report the patient's state of                                                | 1                    | 2               | 3               | 4            | 5                 |

|                                                                                                                             |   |   |   |   |   |
|-----------------------------------------------------------------------------------------------------------------------------|---|---|---|---|---|
| consciousness to the doctor.                                                                                                |   |   |   |   |   |
| 24. I can use SSD assessment tools frequently in my clinical work.                                                          | 1 | 2 | 3 | 4 | 5 |
| 25. I can be trained in SSD to improve my recognition and care.                                                             | 1 | 2 | 3 | 4 | 5 |
| 26. I can use noise reduction, eye masks or earplugs at night to prevent patients' sleep deprivation.                       | 1 | 2 | 3 | 4 | 5 |
| 27. Depending on the patient, I can administer daily arousal (or daily sedation interruption) and cognitive stimulation.    | 1 | 2 | 3 | 4 | 5 |
| 28. I will choose sedative and respiratory expansion training according to the patient's condition.                         | 1 | 2 | 3 | 4 | 5 |
| 29. I will encourage the patient's family members to accompany the patient as much as possible if conditions permit.        | 1 | 2 | 3 | 4 | 5 |
| 30. I will help the patient with early functional exercise if conditions permit.                                            | 1 | 2 | 3 | 4 | 5 |
| 31. I would recommend early transfer out of ICU if the condition permits.                                                   | 1 | 2 | 3 | 4 | 5 |
| 32. I will carefully evaluate whether the patients need to be restricted to avoid the stimulation of unnecessary restraint. | 1 | 2 | 3 | 4 | 5 |
